# Supplementary figures and images for: Structural characterization of a polysaccharide from Abelmoschus esculentus L. Moench (okra) and its hypoglycemic effect and mechanism on type 2 diabetes mellitus
Source: Royal Society of Chemistry journal article supplement (doi:10.1039/d2fo02575b), 2022-01-01

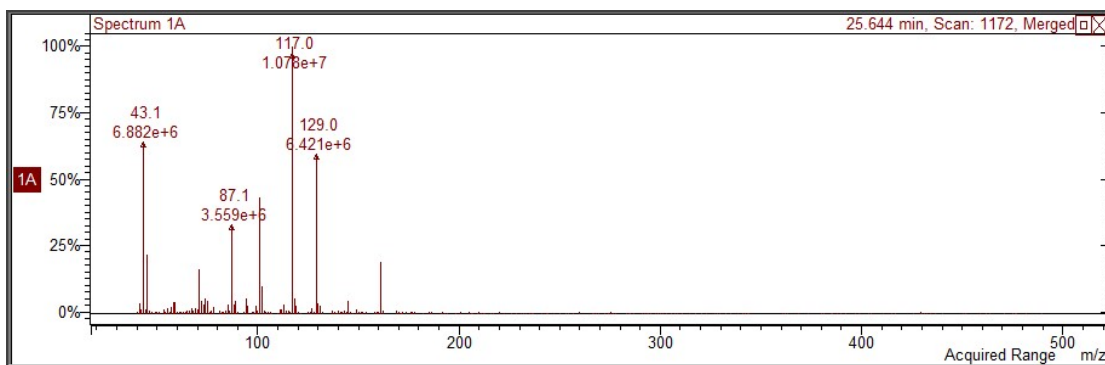

Rhap-(1→)

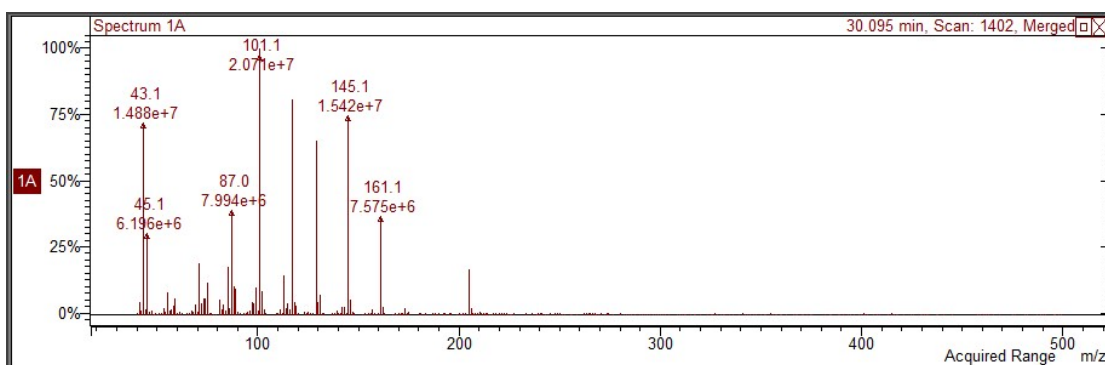

Galp-(1→)

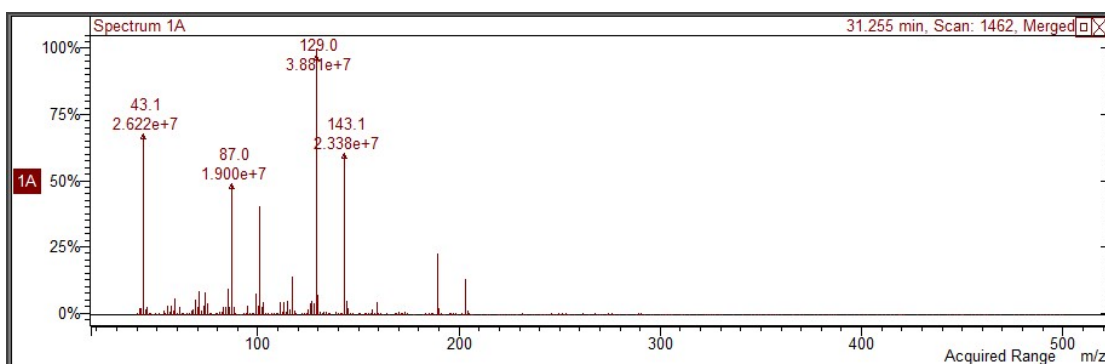

2,4)-Rhap-(1→)

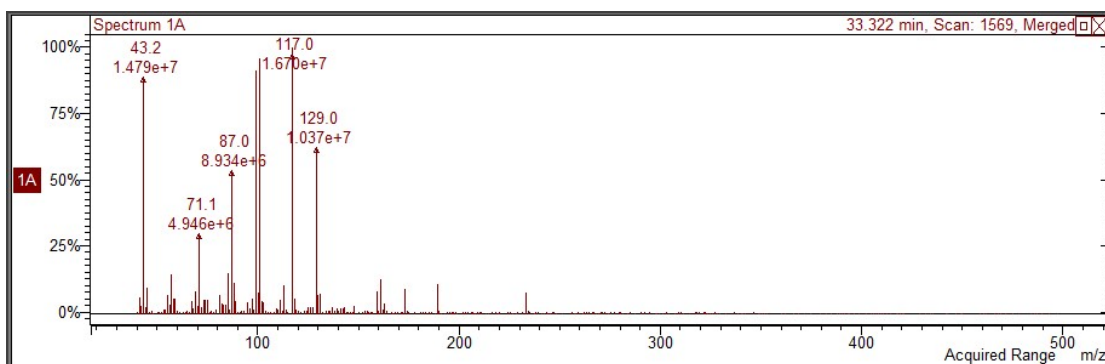

6)-Galp-(1→)

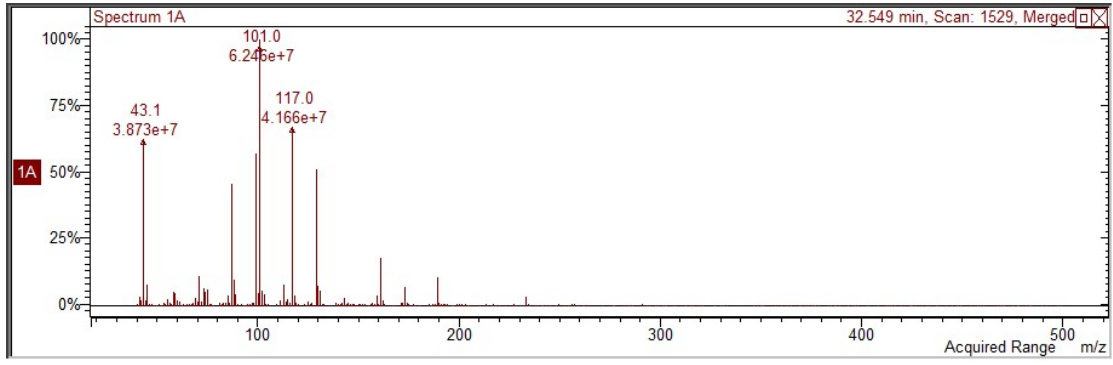

4)-Galp-(1→

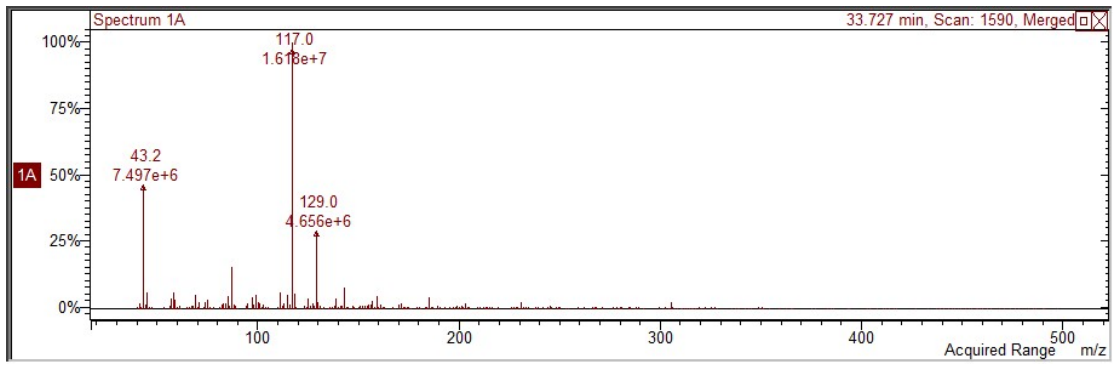

→3,4)-Galp-(1→

Fig. S1 Methylated fragment peaks

Supplement: d2fo02575b1.pdf [file d2fo02575b1.pdf]
